# Supplementary material for: New fluorene-based chiral copolymers with unusually high optical activity in pristine and annealed thin films
Source: Royal Society of Chemistry journal article supplement (doi:10.1039/c5ra26523a), 2016-01-01
Supplement: c5ra26523a1.pdf [file c5ra26523a1.pdf]

## Supporting Information

### **New fluorene-based chiral copolymers with unusually high optical activity in pristine and annealed thin films**

Min Ju Cho,<sup>a‡</sup> Jong-Soo Ahn,<sup>a‡</sup> Young-Un Kim,<sup>a</sup> Hyun Ah Um,<sup>a</sup> Paras N. Prasad,<sup>b</sup> Geon Joon Lee,<sup>c\*</sup> and Dong Hoon Choi<sup>a\*</sup>

<sup>a</sup> Department of Chemistry, Research Institute for Natural Sciences, Korea University, 5 Anam-dong, Sungbuk-gu, Seoul 136-701, Korea

<sup>b</sup> Institute for Lasers, Photonics and Biophotonics, Department of Chemistry, State University of New York at Buffalo, Buffalo, NY14260, USA

<sup>c</sup> Department of Electrical and Biological Physics, Kwangwoon University, 20 Kwangwoonro, Nowon-gu, Seoul 139-701, Korea

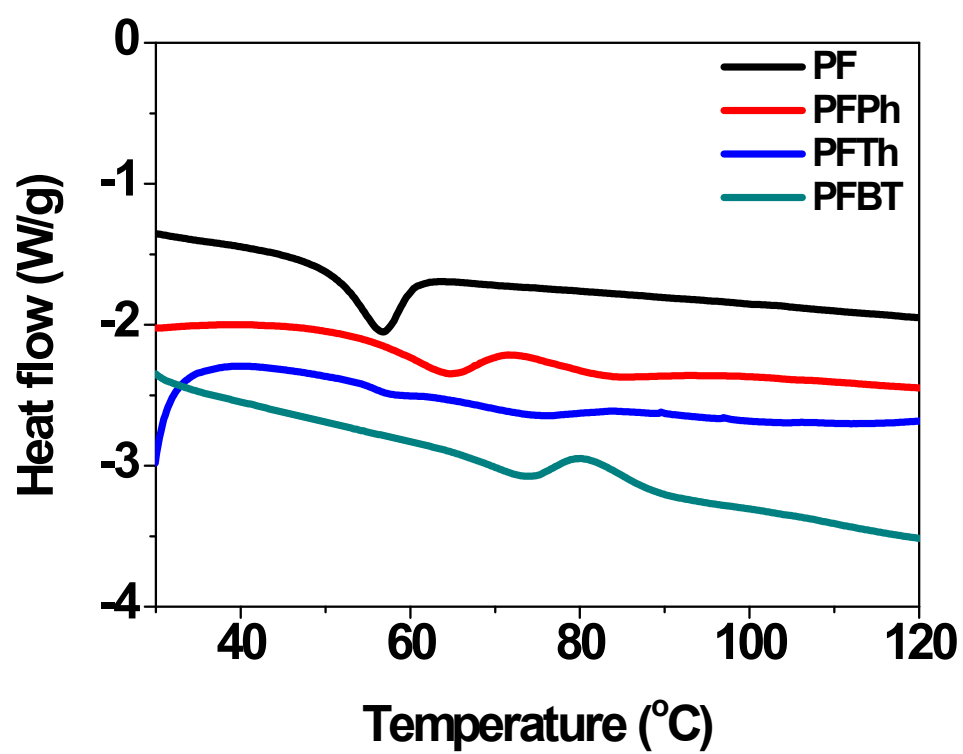

Figure S1. DSC curves of PF-based chiroptical polymers.

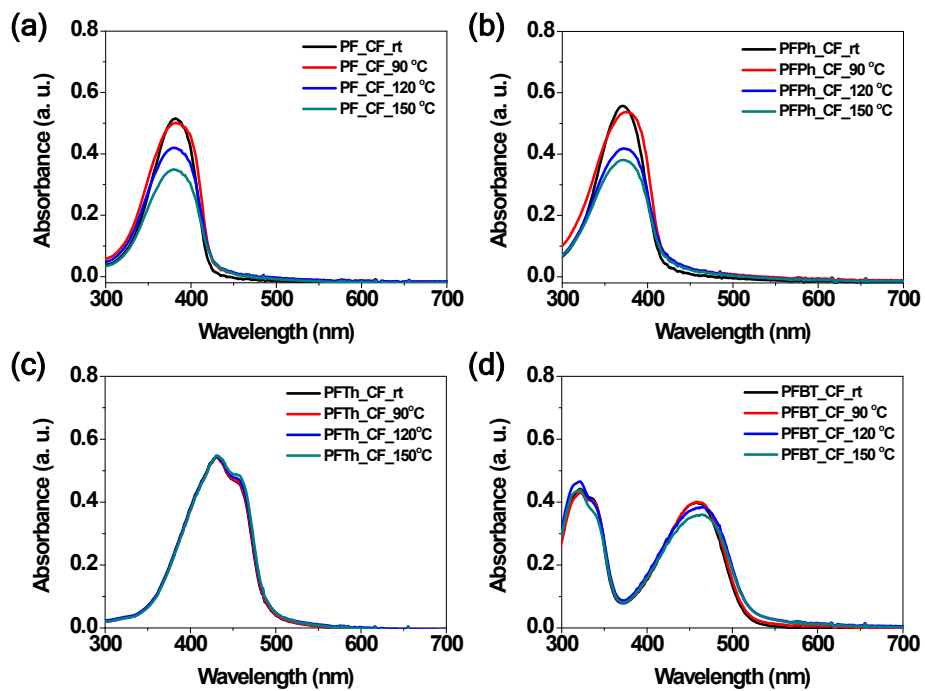

**Figure S2.** UV-vis absorption spectra of polymer films made with chloroform solutions. (a) PF, (b) PFPh, (c) PFTh, (d) PFBT.

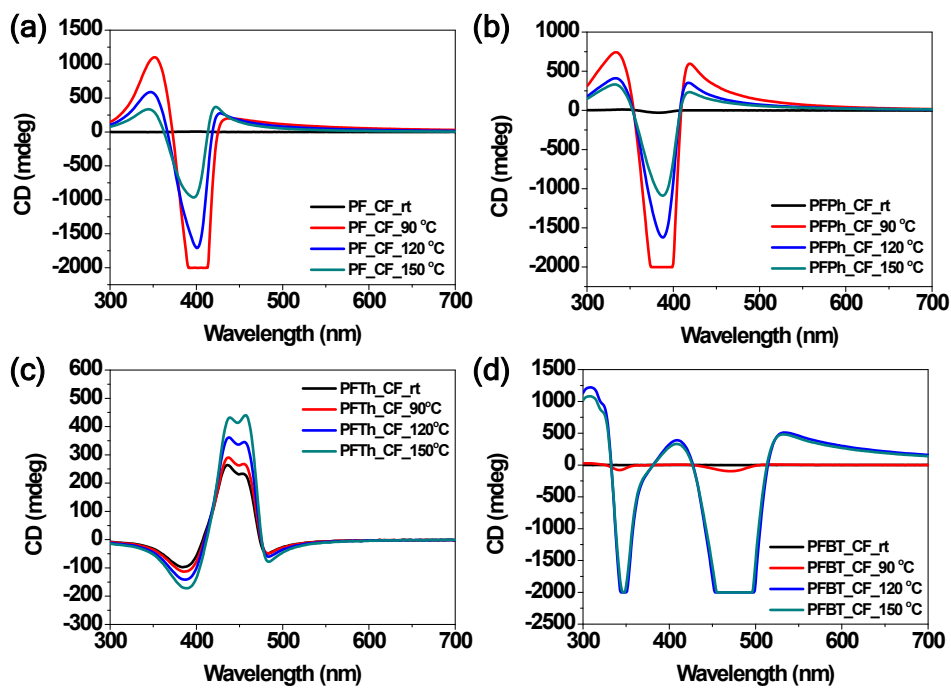

**Figure S3.** CD spectra of polymer films made with chloroform solution. (a) PF, (b) PFPh, (c) PFTh, (d) PFBT.

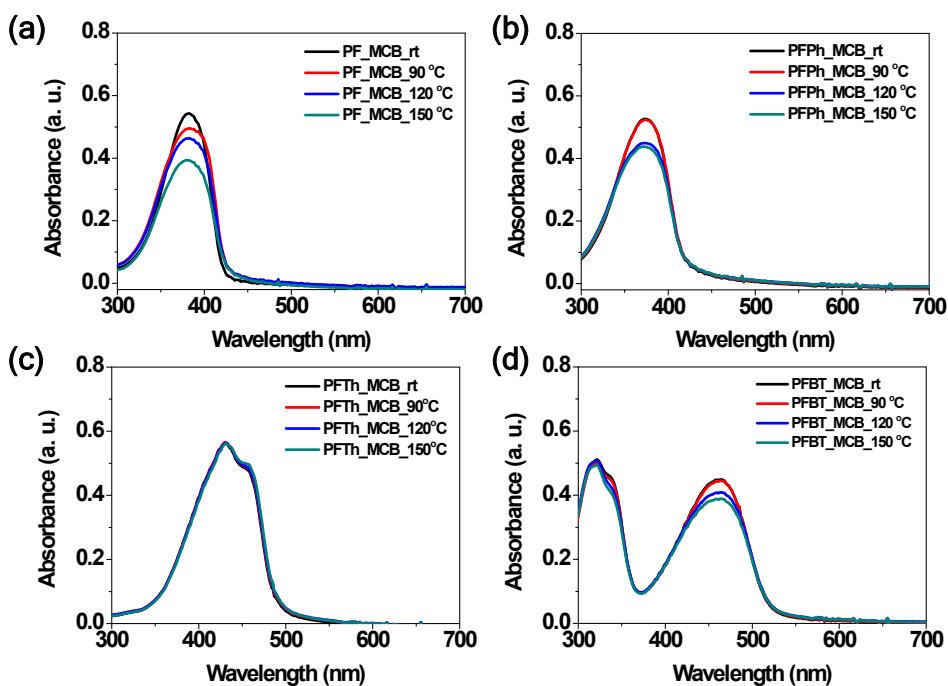

**Figure S4.** UV-vis absorption spectra of polymer films made with monochlorobenzene (MCB) solution. (a) PF, (b) PFPh, (c) PFTh, (d) PFBT.

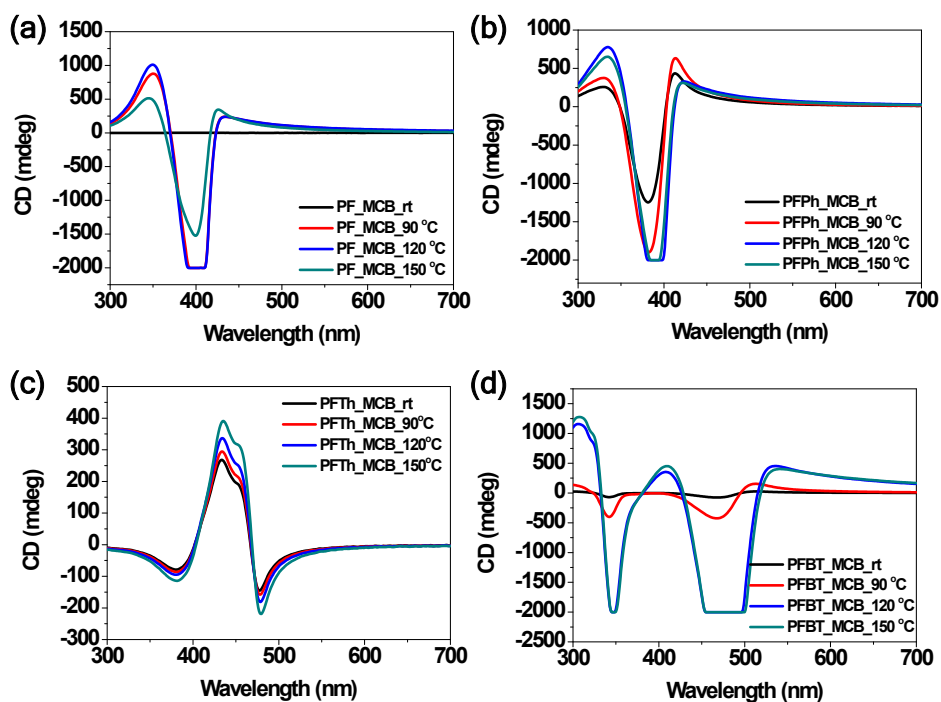

**Figure S5.** CD spectra of polymer films made with monochlorobenzene (MCB) solution. (a) PF, (b) PFPh, (c) PFTh, (d) PFBT.

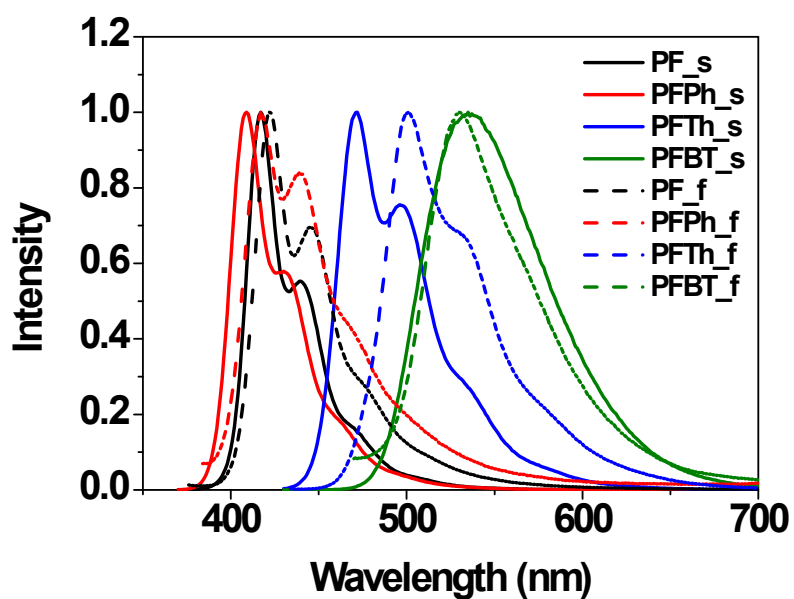

Figure S6. PL spectra of PF, PFPh, PFTh, and PFBT polymers in solution and film

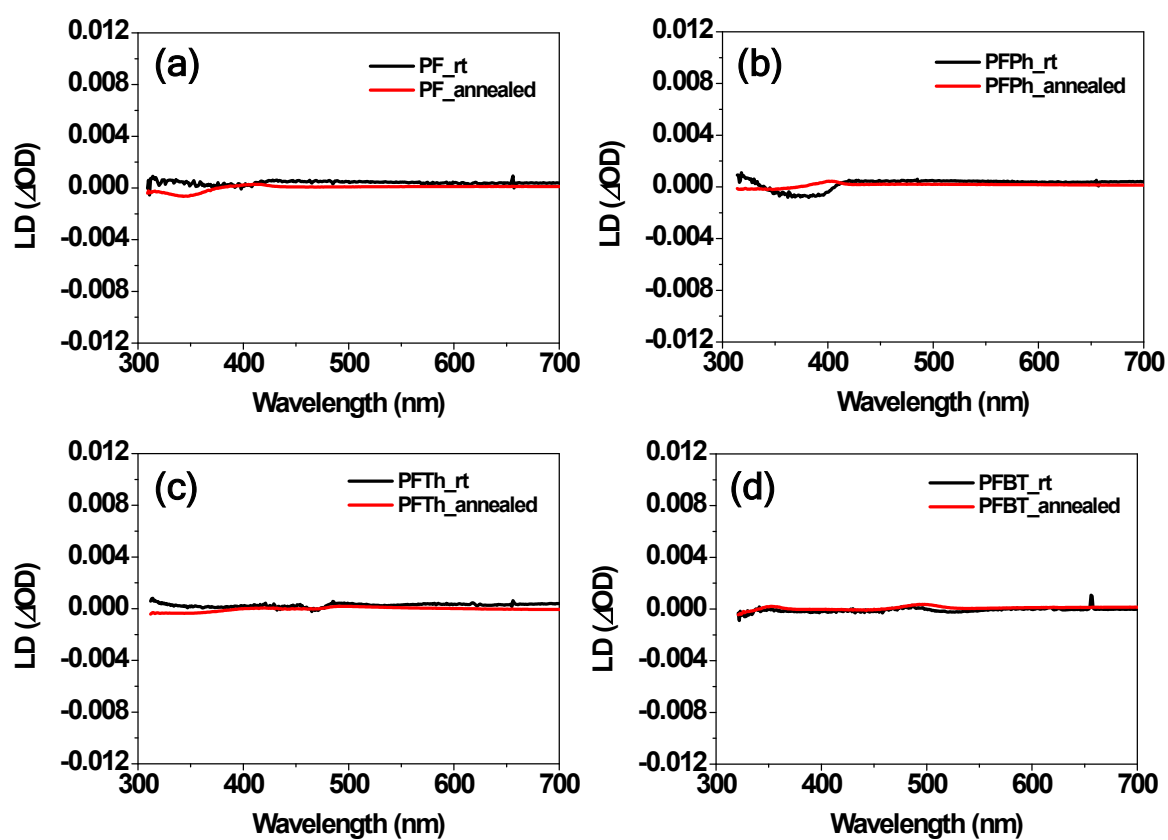

Figure S7. Linear dichroism (LD) of polymer films before and after annealing

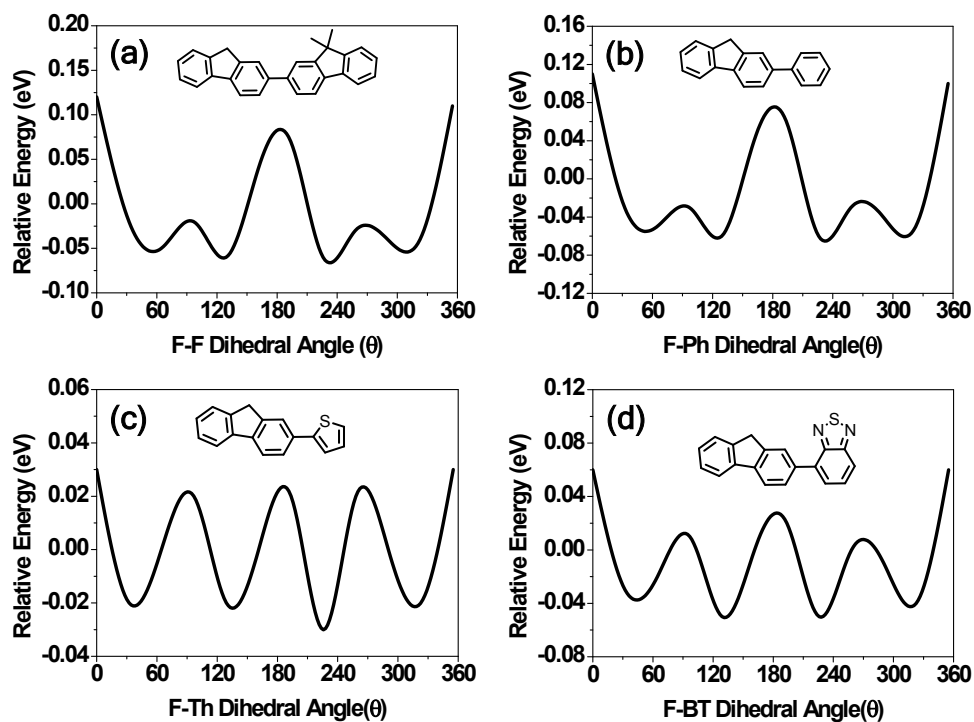

**Figure S8.** Relative potential energies of F-F, F-Ph, F-Th, and F-BT molecular structures as a function of torsion angles.

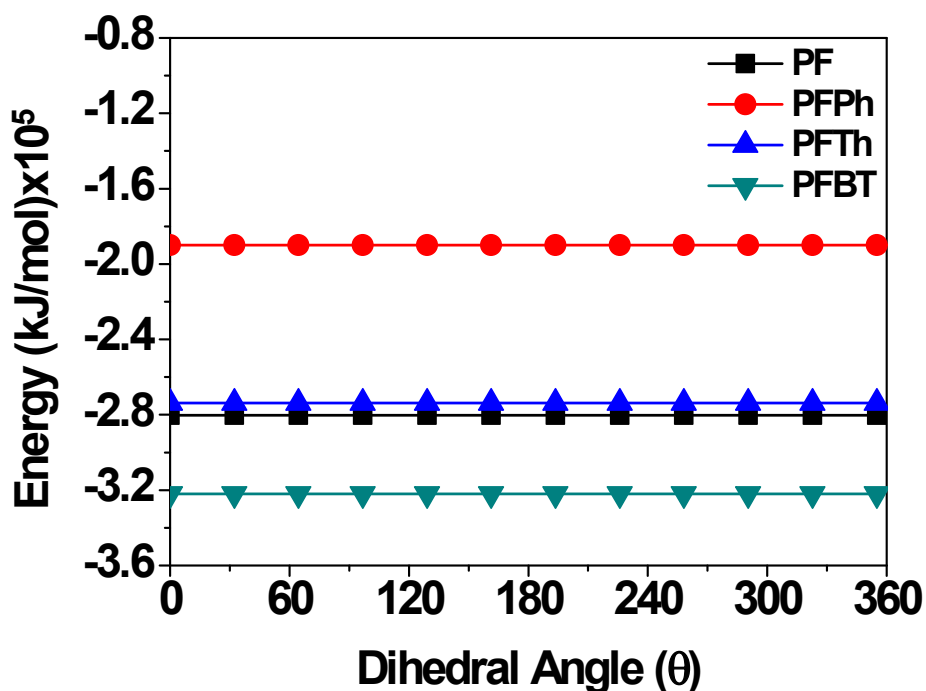

**Figure S9.** Potential energies of the F-F, F-Ph, F-Th, and F-BT molecular structures as a function of the torsion angles.
